# Supplementary material for: The molecular mechanism behind the stabilization of insulin by choline and geranate (CAGE) ionic liquids – computational insights into oral insulin drug formulation
Source: Royal Society of Chemistry journal article supplement (doi:10.1039/d1cp03349b), 2021-01-01
Supplement: d1cp03349b1.pdf [file d1cp03349b1.pdf]

## **Electronic Supplementary Information (ESI)**

### **Molecular Mechanism Behind the Stabilization of Insulin by Choline and Geranate (CAGE) Ionic Liquids - Computational Insights on Oral Insulin Drug Formulation**

**Kandhan Palanisamy,<sup>†</sup> and Muthuramalingam Prakash<sup>\*,†</sup>**

*<sup>†</sup> Department of Chemistry, SRM Institute of Science and Technology, Kattankulathur 603203,  
Chennai, Tamil Nadu, India*

<sup>†</sup> **Electronic Supplementary Information (ESI) available:** The average values of RMSD and Rg, RMSF plots, H-bonding interactions of insulin with CAGE and water, RDF plots of water molecules with choline and geranate, and RDF plots of water molecules with carbonyl and amino groups.

**Table S1** The RMSD and radius of gyration values of insulin backbone with different mole fractions of CAGE ILs and water.

| No of systems | Mole fractions of CAGE ILs | Backbone RMSD (Å) | Backbone Rg (nm) |
|---------------|----------------------------|-------------------|------------------|
| 1.            | 0                          | 1.66              | 1.32             |
| 2.            | 0.05                       | 1.75              | 1.33             |
| 3.            | 0.10                       | 1.47              | 1.33             |
| 4.            | 0.30                       | 1.42              | 1.29             |
| 5.            | 0.50                       | 1.47              | 1.31             |
| 6.            | 0.80                       | 1.79              | 1.34             |
| 7.            | 1.00                       | 1.12              | 1.33             |

**Table S2** The atom types and charges of choline cation.

| Atom names | Atom types | Charges |
|------------|------------|---------|
| O1         | OH         | -0.6710 |
| H5         | HO         | 0.4658  |
| C2         | CT         | 0.2646  |
| H3         | H1         | 0.0197  |
| H4         | H1         | 0.0197  |
| C1         | CT         | -0.0747 |
| H1         | HP         | 0.1496  |
| H2         | HP         | 0.1496  |
| N1         | N3         | -0.0146 |
| C4         | CT         | -0.3457 |
| H9         | HP         | 0.1920  |
| H10        | HP         | 0.1920  |
| H11        | HP         | 0.1920  |
| C5         | CT         | -0.3457 |
| H12        | HP         | 0.1920  |
| H13        | HP         | 0.1920  |
| H14        | HP         | 0.1920  |
| C3         | CT         | -0.3457 |
| H6         | HP         | 0.1920  |
| H7         | HP         | 0.1920  |
| H8         | HP         | 0.1920  |

**Table S3** The atom types and charges of geranate anion.

| Atom names | Atom types | Charges |
|------------|------------|---------|
| O1         | O2         | -0.8338 |
| C10        | C          | 0.9997  |
| O2         | O2         | -0.8338 |
| C7         | CM         | -0.5719 |
| H9         | HA         | 0.1774  |
| C3         | CM         | 0.2772  |
| C6         | CT         | 0.0678  |
| H6         | HC         | -0.0316 |
| H7         | HC         | -0.0316 |
| H8         | HC         | -0.0316 |
| C1         | CT         | -0.0234 |
| H1         | HC         | -0.0754 |
| H2         | HC         | -0.0754 |
| C2         | CT         | 0.6023  |
| H3         | HC         | -0.1493 |
| H4         | HC         | -0.1493 |
| C4         | CM         | -0.7484 |
| H5         | HA         | 0.2125  |
| C5         | CM         | 0.4973  |
| C9         | CT         | -0.6853 |
| H13        | HC         | 0.1820  |
| H14        | HC         | 0.1820  |
| H15        | HC         | 0.1820  |
| C8         | CT         | -0.6853 |
| H10        | HC         | 0.1820  |
| H11        | HC         | 0.1820  |
| H12        | HC         | 0.1820  |

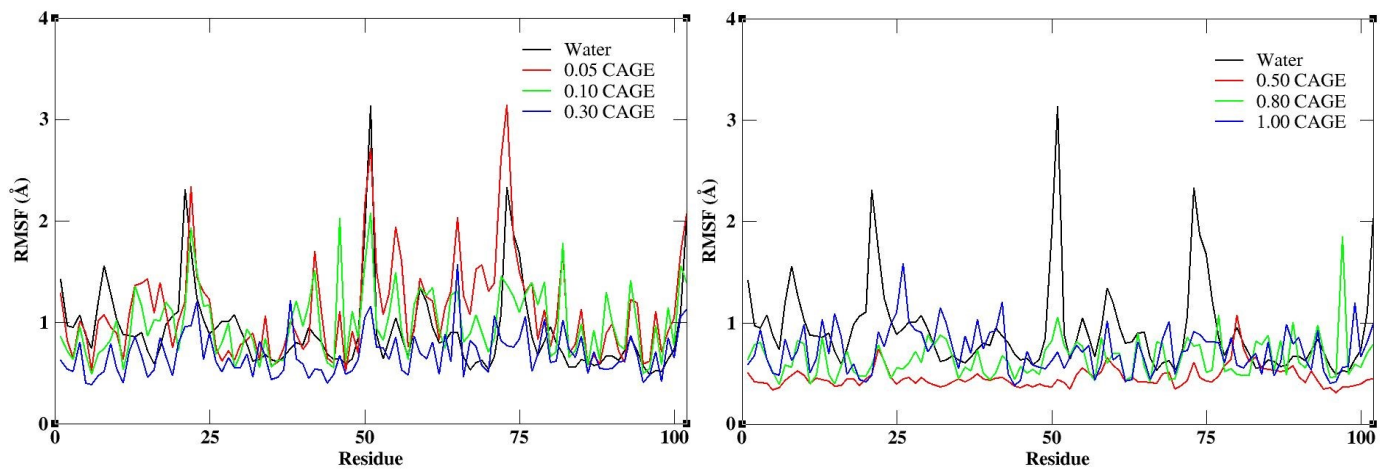

**Fig. S1** The RMSF plots of insulin backbone with water and different mole fraction of CAGE ILs.

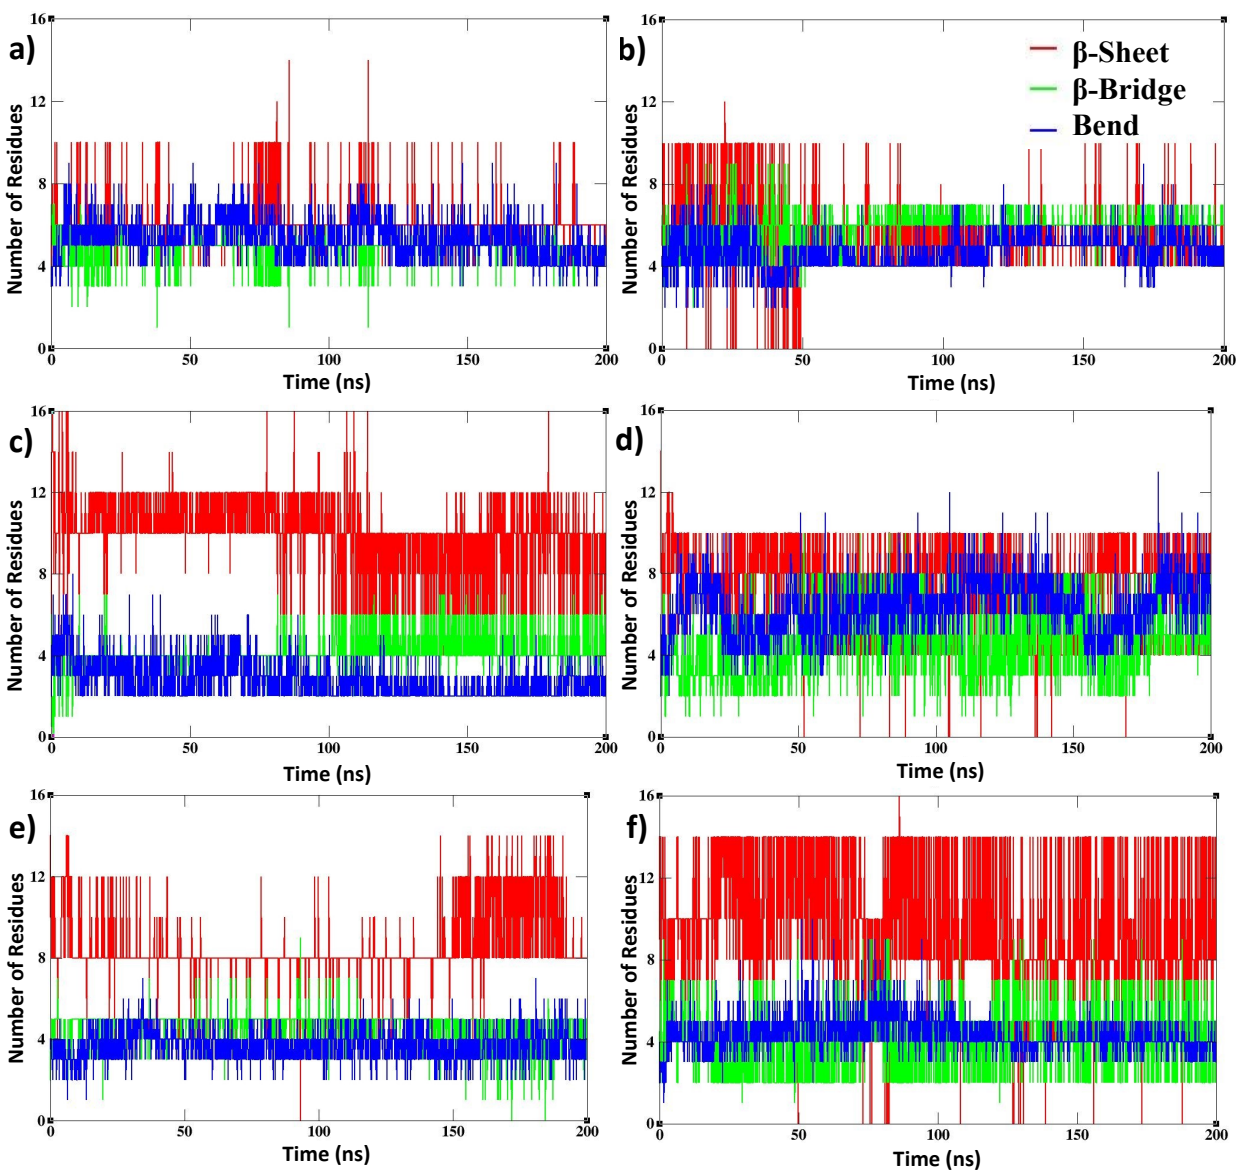

**Fig. S2** The secondary structure of  $\beta$ -Sheet,  $\beta$ -Bridge and Bend are calculated for a) 0.05 b) 0.10 c) 0.30 d) 0.50 e) 0.80 f) 1.00 mole fraction of CAGE ILs.

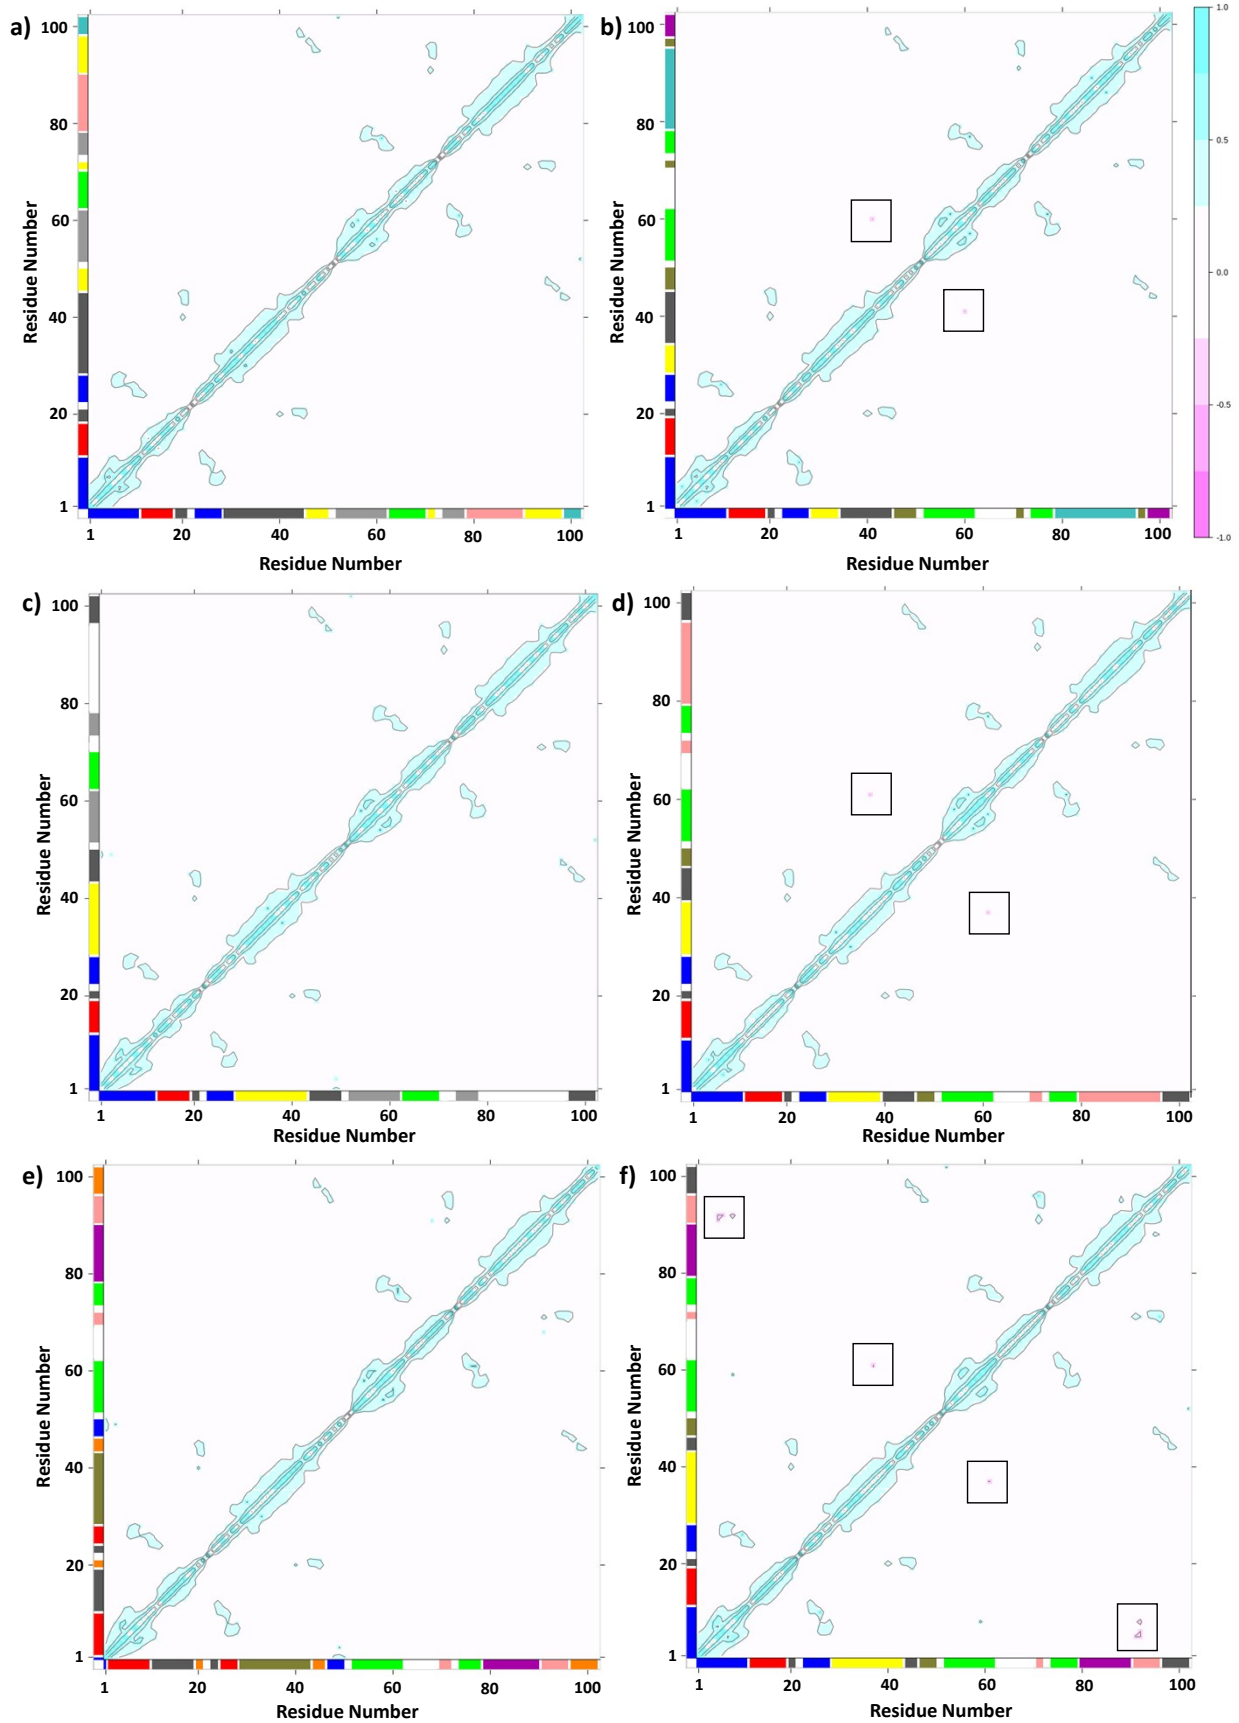

**Fig. S3** The DCCM plots of insulin at a) 0.05 b) 0.10 c) 0.30 d) 0.50 e) 0.80 f) 1.00 mole fraction of CAGE ILs.

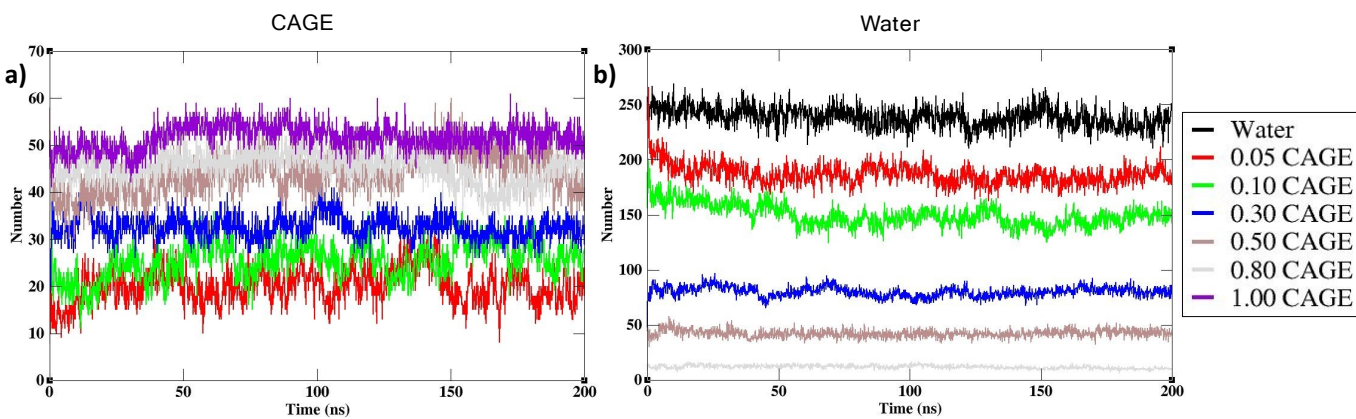

**Fig. S4** The H-bonding interactions of insulin with a) CAGE and b) Water.

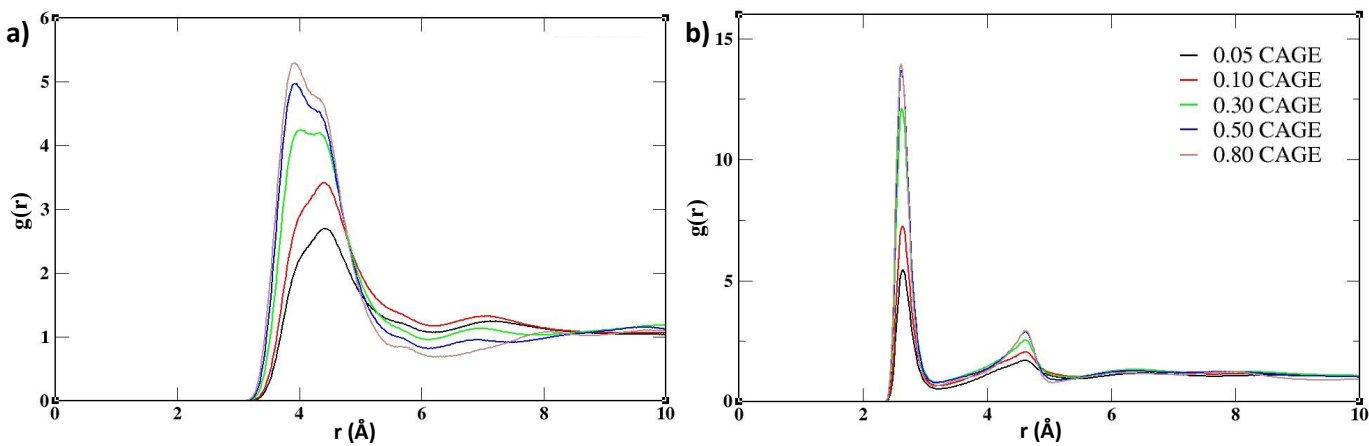

**Fig. S5** The RDF plots of a) choline and b) geranate with water molecules.

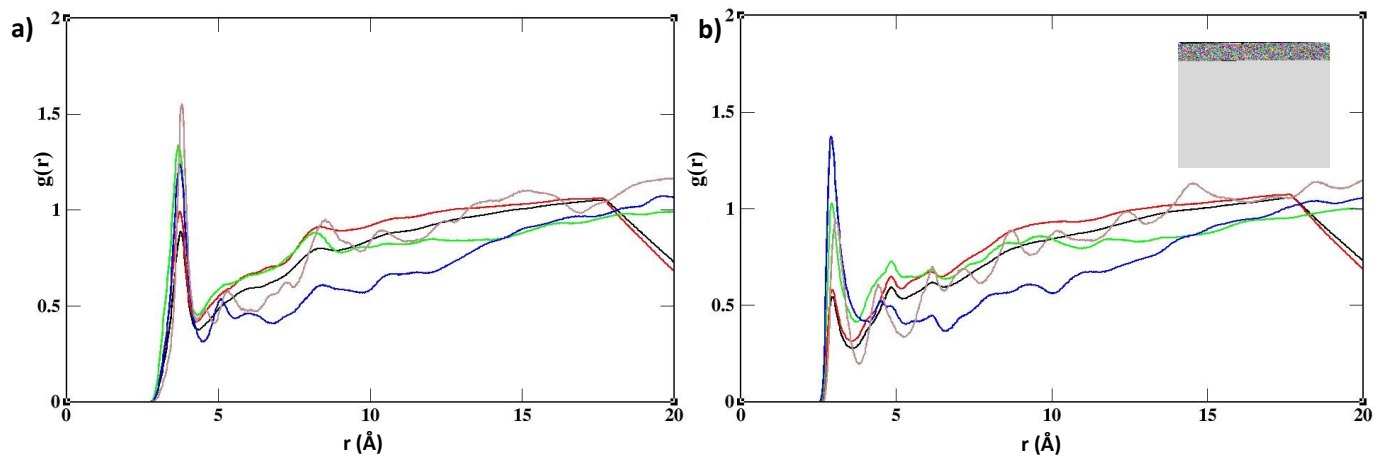

**Fig. S6** The RDF plots of a) carbonyl and b) amino groups of insulin with water molecules.
